# Supplementary material for: Development of Novel S-Protective Thiolated-Based Mucoadhesive Tablets for Repaglinide: Pharmacokinetic Study
Source: MDPI journal article supplement (doi:10.3390/polym14173529), 2022-08-28
Supplement: s1 [file s1]

# Supplementary

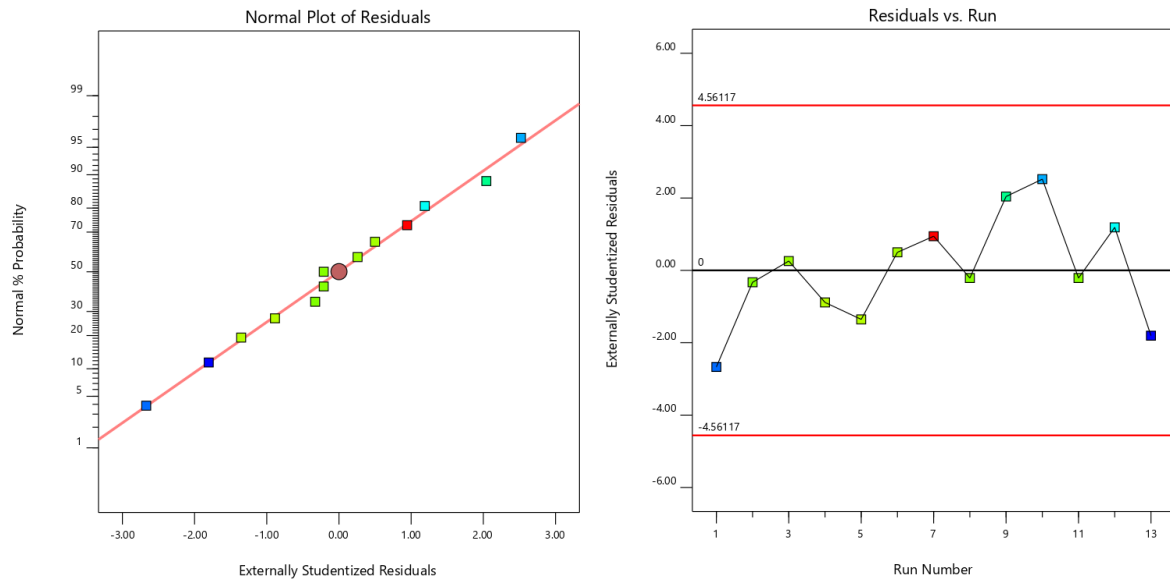

(a)

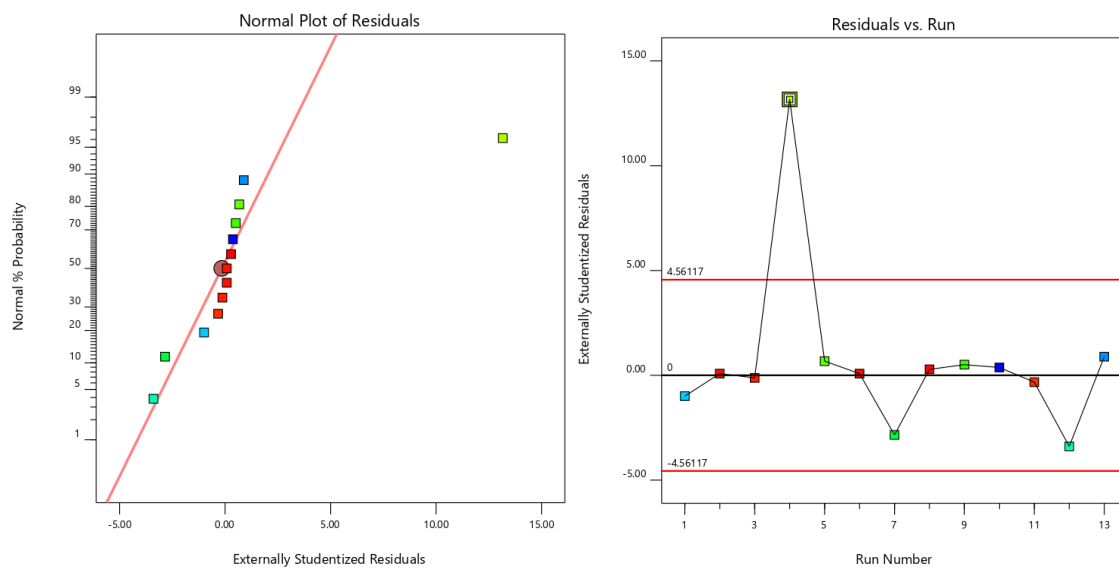

(b)

**Supplementary Figure S1.** Normal probability and residuals plots for (a) viscosity and (b) MS
